# Supplementary material for: The Unusual Increase in Suicides Among Women in Japan During the COVID-19 Pandemic: A Time-series Analysis Until October 2021
Source: PubMed Central journal article supplement (PMC9727214; doi:10.2188/jea.je20220186), 2023-01-05
Supplement: je-33-045-s001.pdf [file je-33-045-s001.pdf]

**eTable 1.** Estimated O/E ratio and its 95% confidence interval per job status, motive, and age category during Term I (March to December, 2020) as sensitivity analysis

|                                    | Estimation using unemployment rate in 2019 |                    |                 | Estimation using unemployment rate in 2018 |                    |                 |
|------------------------------------|--------------------------------------------|--------------------|-----------------|--------------------------------------------|--------------------|-----------------|
|                                    | Total number of expectations               | O/E ratio (95% CI) | <i>P</i> -value | Total number of expectations               | O/E ratio (95% CI) | <i>P</i> -value |
| <b>Job status</b>                  |                                            |                    |                 |                                            |                    |                 |
| Worker                             |                                            |                    |                 |                                            |                    |                 |
| Employee                           | 809.7                                      | 1.58 (1.50–1.67)   | <0.001          | 816.9                                      | 1.57 (1.48–1.66)   | <0.001          |
| Self-employed                      | 115.0                                      | 1.18 (0.99–1.39)   | 0.050           | 117.6                                      | 1.16 (0.97–1.36)   | 0.090           |
| Non-worker                         |                                            |                    |                 |                                            |                    |                 |
| Pension and unemployment insurance | 1484.2                                     | 1.09 (1.04–1.15)   | <0.001          | 1506.6                                     | 1.08 (1.03–1.13)   | 0.003           |
| liver                              |                                            |                    |                 |                                            |                    |                 |
| Housewife                          | 749.1                                      | 1.32 (1.24–1.40)   | <0.001          | 775.1                                      | 1.28 (1.20–1.36)   | <0.001          |
| Student                            | 176.5                                      | 1.72 (1.54–1.92)   | <0.001          | 175.8                                      | 1.73 (1.54–1.93)   | <0.001          |
| Unemployed                         | 58.5                                       | 1.33 (1.06–1.65)   | 0.011           | 58.5                                       | 1.33 (1.06–1.65)   | 0.011           |
| Other non-worker                   | 994.0                                      | 1.33 (1.26–1.40)   | <0.001          | 1020.5                                     | 1.30 (1.23–1.37)   | <0.001          |
| Unknown                            | 478.0                                      | 0.40 (0.35–0.46)   | <0.001          | 471.6                                      | 0.41 (0.35–0.47)   | <0.001          |
| <b>Motive</b>                      |                                            |                    |                 |                                            |                    |                 |
| Health                             | 3020.0                                     | 1.24 (1.20–1.28)   | <0.001          | 3076.5                                     | 1.22 (1.18–1.26)   | <0.001          |
| Family                             | 862.8                                      | 1.22 (1.15–1.29)   | <0.001          | 869.5                                      | 1.21 (1.14–1.28)   | <0.001          |
| Economic                           | 281.7                                      | 1.19 (1.07–1.33)   | 0.001           | 283.3                                      | 1.19 (1.07–1.32)   | 0.001           |
| Work-related                       | 172.9                                      | 1.61 (1.43–1.80)   | <0.001          | 173.0                                      | 1.61 (1.43–1.80)   | <0.001          |
| Relationship                       | 175.8                                      | 1.52 (1.35–1.71)   | <0.001          | 178.4                                      | 1.50 (1.33–1.69)   | <0.001          |
| School-related                     | 63.5                                       | 2.03 (1.70–2.40)   | <0.001          | 63.2                                       | 2.04 (1.71–2.41)   | <0.001          |
| Other                              | 208.5                                      | 1.64 (1.47–1.82)   | <0.001          | 212.7                                      | 1.60 (1.44–1.78)   | <0.001          |
| Unknown reasons                    | 1341.9                                     | 1.14 (1.08–1.20)   | <0.001          | 1355.8                                     | 1.13 (1.07–1.19)   | <0.001          |
| <b>Age, years</b>                  |                                            |                    |                 |                                            |                    |                 |
| <20                                | 164.2                                      | 1.58 (1.40–1.78)   | <0.001          | 162.2                                      | 1.60 (1.42–1.81)   | <0.001          |
| 20–29                              | 475.2                                      | 1.46 (1.36–1.57)   | <0.001          | 478.7                                      | 1.45 (1.35–1.56)   | <0.001          |
| 30–39                              | 483.4                                      | 1.36 (1.26–1.47)   | <0.001          | 499.4                                      | 1.32 (1.22–1.42)   | <0.001          |
| 40–49                              | 731.3                                      | 1.26 (1.19–1.35)   | <0.001          | 743.0                                      | 1.24 (1.17–1.33)   | <0.001          |
| 50–59                              | 750.6                                      | 1.19 (1.11–1.27)   | <0.001          | 756.8                                      | 1.18 (1.10–1.26)   | <0.001          |
| 60–69                              | 700.2                                      | 1.14 (1.06–1.22)   | <0.001          | 719.5                                      | 1.11 (1.03–1.19)   | 0.003           |
| 70–79                              | 814.8                                      | 1.14 (1.07–1.22)   | <0.001          | 828.5                                      | 1.12 (1.05–1.20)   | <0.001          |
| ≥80                                | 724.1                                      | 1.05 (0.98–1.13)   | 0.159           | 733.0                                      | 1.04 (0.97–1.12)   | 0.285           |

CI, confidence interval; O/E ratio, ratio of observed to expected results.

**eTable 2.** Estimated O/E ratio and its 95% confidence interval per job status, motive, and age category during Term II (January to October, 2021) as sensitivity analysis

|                                    | Estimation using unemployment rate in 2019 |                    |                 | Estimation using unemployment rate in 2018 |                    |                 |
|------------------------------------|--------------------------------------------|--------------------|-----------------|--------------------------------------------|--------------------|-----------------|
|                                    | Total number of expectations               | O/E ratio (95% CI) | <i>P</i> -value | Total number of expectations               | O/E ratio (95% CI) | <i>P</i> -value |
| <b>Job status</b>                  |                                            |                    |                 |                                            |                    |                 |
| Worker                             |                                            |                    |                 |                                            |                    |                 |
| Employee                           | 812.0                                      | 1.51 (1.43–1.60)   | <0.001          | 809.8                                      | 1.52 (1.43–1.60)   | <0.001          |
| Self-employed                      | 117.6                                      | 1.10 (0.92–1.30)   | 0.295           | 116.5                                      | 1.10 (0.93–1.31)   | 0.249           |
| Non-worker                         |                                            |                    |                 |                                            |                    |                 |
| Pension and unemployment insurance | 1496.3                                     | 1.08 (1.03–1.13)   | 0.003           | 1487.9                                     | 1.08 (1.03–1.14)   | 0.001           |
| liver                              |                                            |                    |                 |                                            |                    |                 |
| Housewife                          | 757.8                                      | 1.20 (1.12–1.28)   | <0.001          | 745.5                                      | 1.22 (1.14–1.30)   | <0.001          |
| Student                            | 185.0                                      | 1.75 (1.56–1.94)   | <0.001          | 185.5                                      | 1.74 (1.56–1.94)   | <0.001          |
| Unemployed                         | 56.4                                       | 1.29 (1.02–1.61)   | 0.027           | 55.4                                       | 1.32 (1.04–1.64)   | 0.019           |
| Other non-worker                   | 991.0                                      | 1.31 (1.24–1.39)   | <0.001          | 980.5                                      | 1.33 (1.26–1.40)   | <0.001          |
| Unknown                            | 483.6                                      | 0.61 (0.54–0.68)   | <0.001          | 489.9                                      | 0.60 (0.53–0.67)   | <0.001          |
| <b>Motive</b>                      |                                            |                    |                 |                                            |                    |                 |
| Health                             | 3031.2                                     | 1.15 (1.11–1.19)   | <0.001          | 3010.6                                     | 1.16 (1.12–1.20)   | <0.001          |
| Family                             | 860.6                                      | 1.27 (1.20–1.35)   | <0.001          | 854.8                                      | 1.28 (1.21–1.36)   | <0.001          |
| Economic                           | 282.6                                      | 1.31 (1.18–1.45)   | <0.001          | 280.5                                      | 1.32 (1.19–1.46)   | <0.001          |
| Work-related                       | 172.1                                      | 1.42 (1.25–1.60)   | <0.001          | 171.7                                      | 1.42 (1.25–1.61)   | <0.001          |
| Relationship                       | 177.9                                      | 1.56 (1.38–1.75)   | <0.001          | 175.6                                      | 1.58 (1.40–1.77)   | <0.001          |
| School-related                     | 65.2                                       | 1.43 (1.16–1.74)   | <0.001          | 64.7                                       | 1.44 (1.17–1.75)   | <0.001          |
| Other                              | 210.0                                      | 1.43 (1.28–1.60)   | <0.001          | 207.9                                      | 1.45 (1.29–1.62)   | <0.001          |
| Unknown reasons                    | 1350.0                                     | 1.16 (1.10–1.22)   | <0.001          | 1345.8                                     | 1.16 (1.11–1.22)   | <0.001          |
| <b>Age, years</b>                  |                                            |                    |                 |                                            |                    |                 |
| <20                                | 168.0                                      | 1.57 (1.39–1.77)   | <0.001          | 169.7                                      | 1.56 (1.38–1.75)   | <0.001          |
| 20–29                              | 476.1                                      | 1.62 (1.51–1.74)   | <0.001          | 473.9                                      | 1.63 (1.51–1.74)   | <0.001          |
| 30–39                              | 497.8                                      | 1.25 (1.16–1.35)   | <0.001          | 493.6                                      | 1.26 (1.17–1.36)   | <0.001          |
| 40–49                              | 736.8                                      | 1.22 (1.14–1.30)   | <0.001          | 732.6                                      | 1.22 (1.14–1.30)   | <0.001          |
| 50–59                              | 737.4                                      | 1.23 (1.16–1.32)   | <0.001          | 732.6                                      | 1.24 (1.16–1.32)   | <0.001          |
| 60–69                              | 715.2                                      | 1.01 (0.94–1.08)   | 0.799           | 707.0                                      | 1.02 (0.95–1.10)   | 0.572           |
| 70–79                              | 819.3                                      | 1.14 (1.07–1.22)   | <0.001          | 813.3                                      | 1.15 (1.08–1.23)   | <0.001          |
| ≥80                                | 720.9                                      | 1.03 (0.96–1.11)   | 0.370           | 716.1                                      | 1.04 (0.97–1.12)   | 0.280           |

CI, confidence interval; O/E ratio, ratio of observed to expected results.

Employee

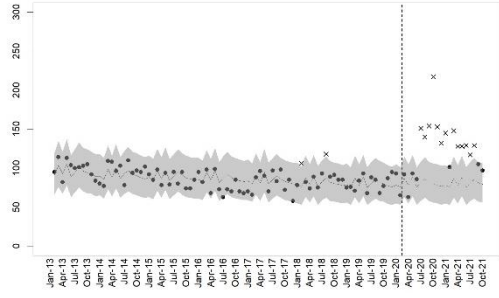

Self-employed

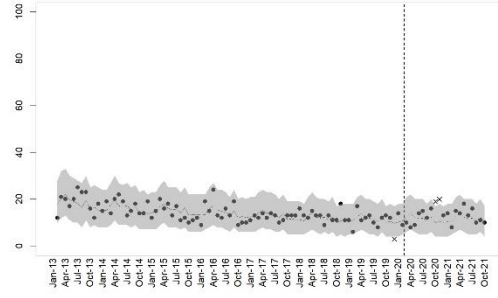

Pension/unemployment insurance liver

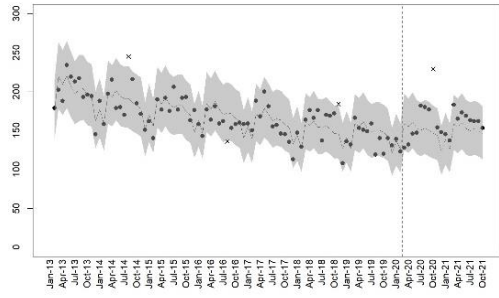

Housewife

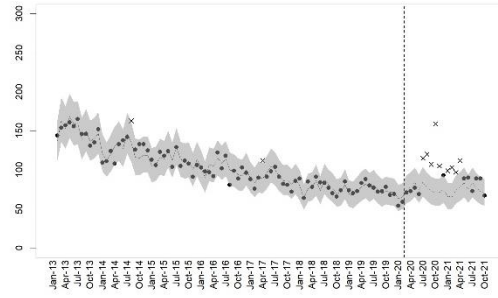

Student

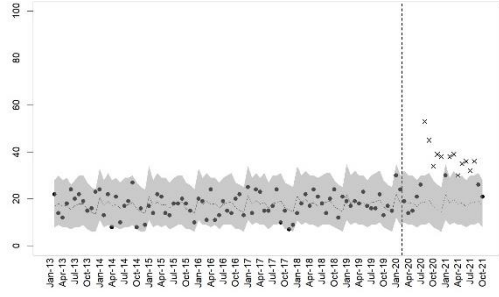

Unemployed

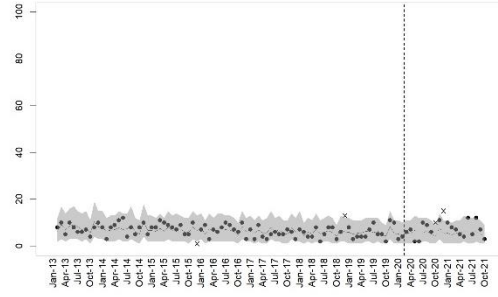

(Other) non-workers

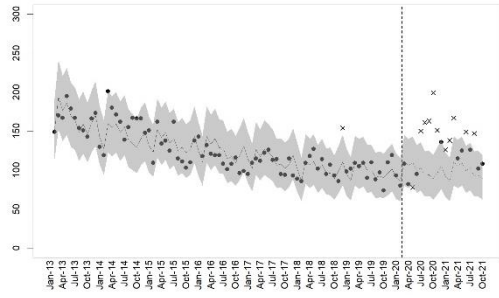

Unknown

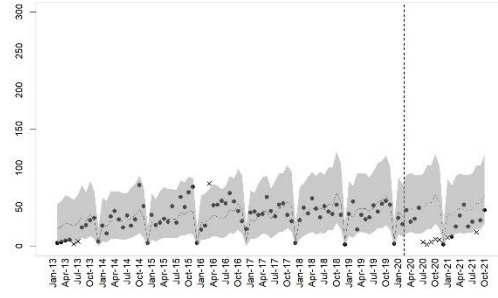

**Figure 1.** Number of suicides among females by job status categories from January 2013 to October 2021. The dots represent the observed number of suicides within the 95% prediction interval (marked by the gray strip); The “x” represents the observed number of suicides outside the 95% prediction intervals. The solid line marks the predicted number of suicides in non-pandemic periods, whereas the dashed line represents the predicted number of suicides during the pandemic.

### Health

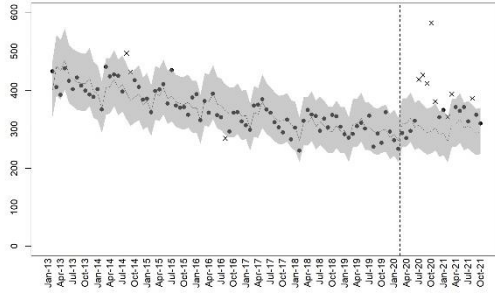

### Family

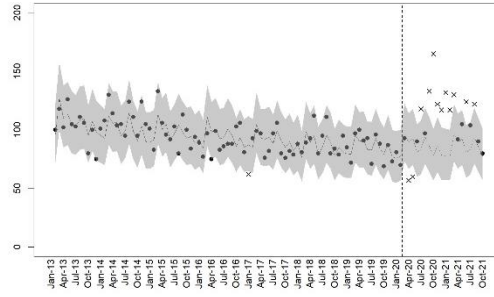

### Economic

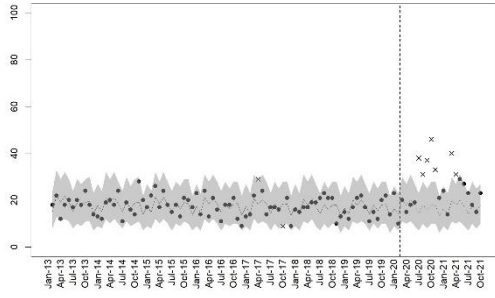

### Work-related

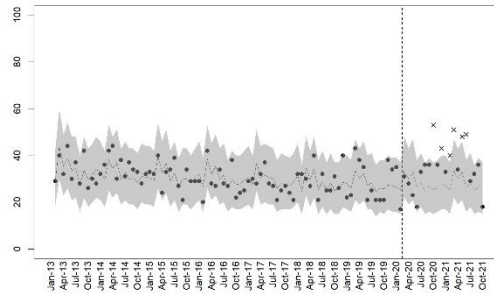

### Relationship

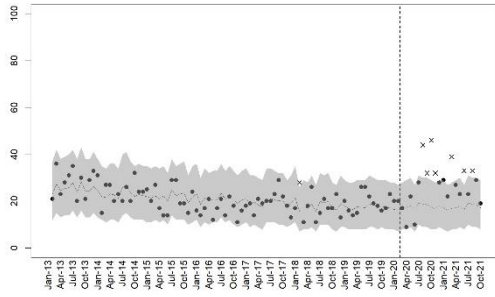

### School-related

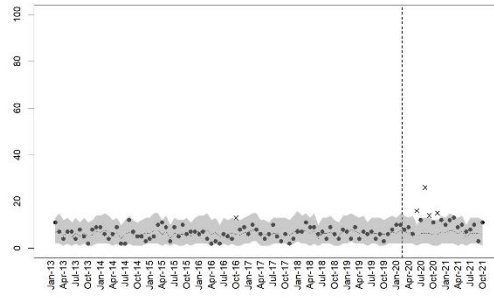

### Other

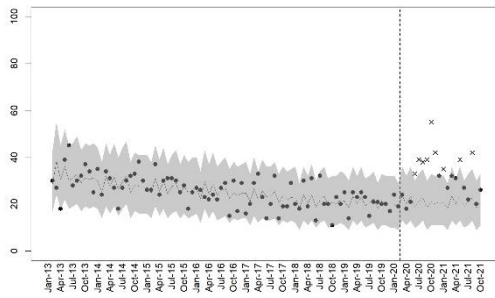

### Unknown reasons

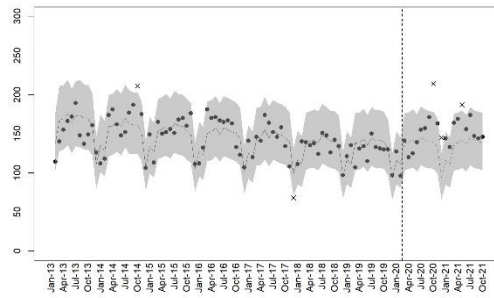

**eFigure 2.** Number of suicides among females by motive categories from January 2013 to October 2021. The dots represent the observed number of suicides within the 95% prediction interval (marked by the gray strip); The “x” represents the observed number of suicides outside the 95% prediction intervals. The solid line marks the predicted number of suicides in non-pandemic periods, whereas the dashed line represents the predicted number of suicides during the pandemic.

<20 years old

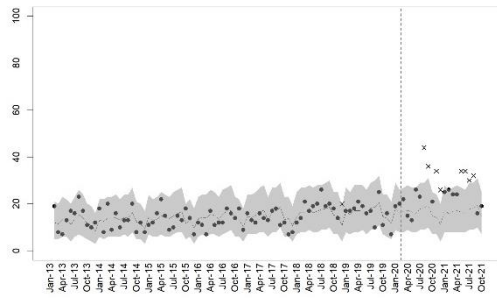

20–29 years old

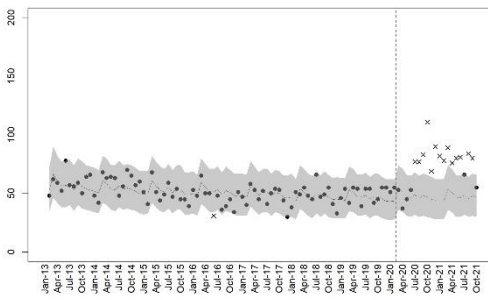

30–39 years old

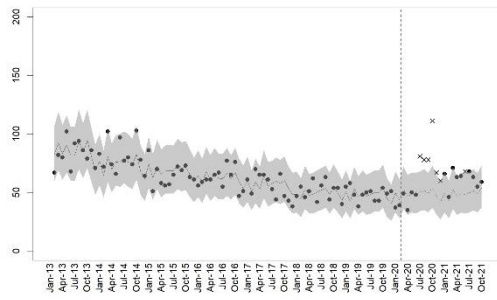

40–49 years old

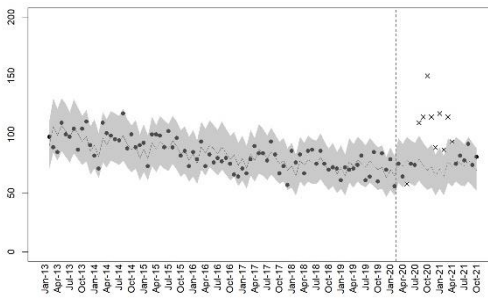

50–59 years old

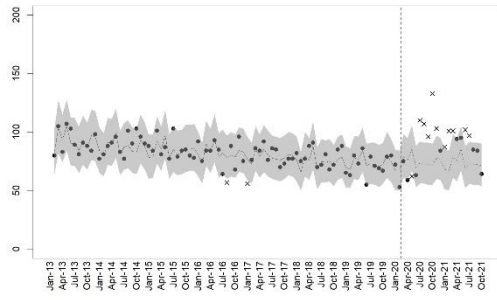

60–69 years old

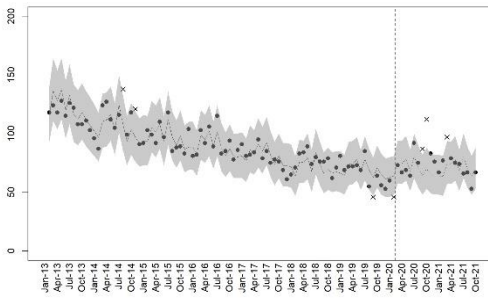

70–79 years old

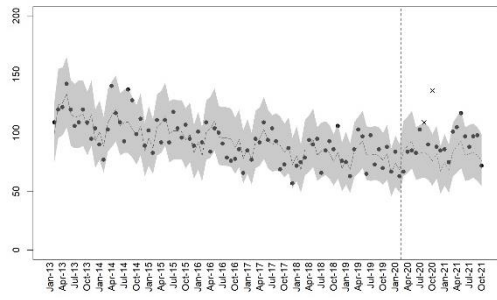

≥80 years old

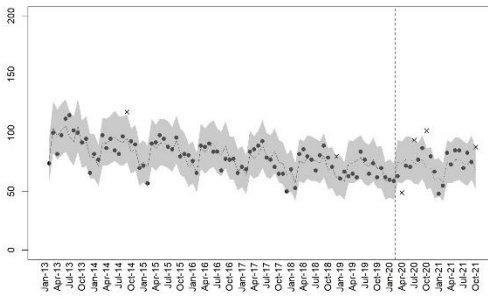

**eFigure 3.** Number of suicides among females by age categories from January 2013 to October 2021. The dots represent the observed number of suicides within the 95% prediction interval (marked by the gray strip); The “x” represents the observed number of suicides outside the 95% prediction intervals. The solid line marks the predicted number of suicides in non-pandemic periods, whereas the dashed line represents the predicted number of suicides during the pandemic.
